# Supplementary material for: Structure-Based Design of a Cyclic Peptide Inhibitor of the SARS-CoV-2 Main Protease
Source: bioRxiv or medRxiv preprint supplement (doi:10.1101/2020.08.03.234872), 2020-08-05

**Supplementary Information for:**  
**Structure-Based Design of a Cyclic Peptide Inhibitor of the SARS-CoV-2 Main Protease**

Adam G. Kreutzer,<sup>a</sup> Maj Krumberger,<sup>a</sup> Chelsea Marie T. Parrocha,<sup>b</sup> Michael A. Morris,<sup>a</sup>  
Gretchen Guaglianone,<sup>a</sup> and James S. Nowick<sup>\*a,b</sup>

<sup>a</sup>Department of Chemistry, University of California, Irvine

<sup>b</sup>Department of Pharmaceutical Sciences, University of California, Irvine

Irvine, California 92697-2025, United States

\*To whom correspondence should be addressed:  
jsnowick@uci.edu

**This PDF includes:**

**Supplementary Figures**

Figure S1. Continuous kinetic assay of UCI-1 inhibition of the SARS-CoV-2 –MBP M<sup>pro</sup>. S2

**Supplementary Procedures** S2

Synthesis and characterization of Fmoc-AEPA-OH. S2

**Peptide Characterization Data**

Characterization of UCI-1. S12

Characterization of peptide-1a. S14

Characterization of peptide-1b. S16

## Supplementary Figures

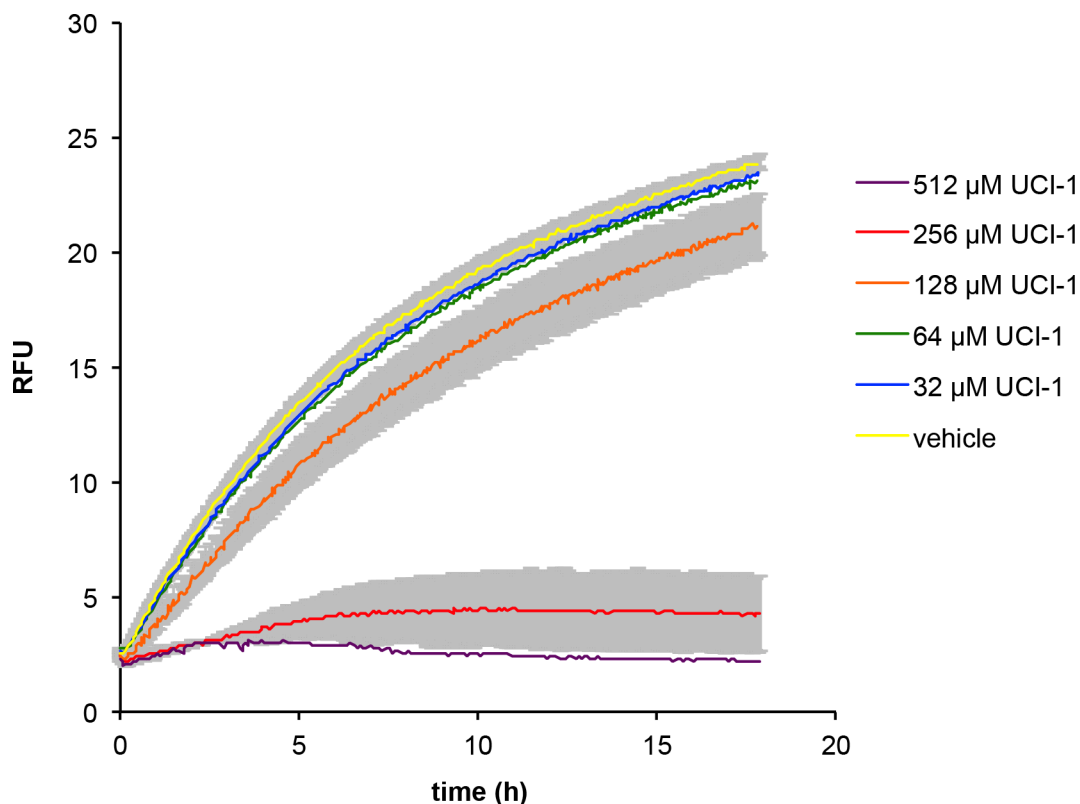

**Figure S1.** Continuous kinetic inhibition assay of UCI-1 against MBP-M<sup>pro</sup>. For clarity, error bars ( $\pm$  s.d.) are only shown for 256  $\mu$ M UCI-1, 128  $\mu$ M UCI-1, and vehicle.

## Supplementary Procedures

### Synthesis of 2-(4-(2-(((9H-fluoren-9-yl)methoxy)carbonyl)amino)ethyl)phenyl)acetic acid (Fmoc-AEPA)

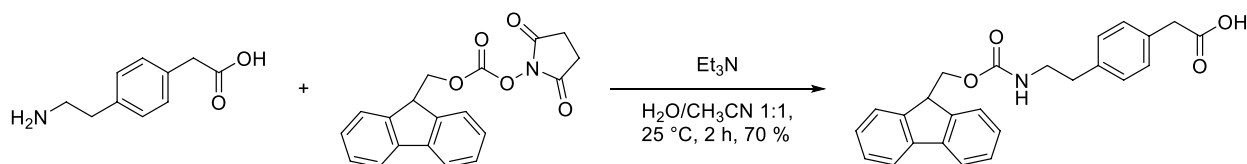

A 50 mL round-bottom flask equipped with a magnetic stirring bar was charged with 100 mg (0.55 mmol, 1 equiv) of 2-(4-(2-aminoethyl)phenyl)acetic acid dissolved in 10 mL H<sub>2</sub>O. 0.156 mL (1.10 mmol, 2 equiv) of Et<sub>3</sub>N was added. 160 mg of Fmoc-OSu (0.50 mmol, 0.9 equiv) was dissolved in 10 mL CH<sub>3</sub>CN and added to the reaction mixture. The reaction was run for 2 hours at room temperature. While it was running, the reaction was monitored by TLC (3:1

EtOAc/hexanes + 10 % MeOH,  $R_f = 0.44$ ) to determine the consumption of starting material and ( $R_f = 0.77$ ) and an appearance of fulvene ( $R_f = 0.81$ ). 10 mL of EtOAc was then added to the reaction mixture and the organic layer was removed. The aqueous layer was acidified with 30 mL 1 M HCl, and then 10 mL of EtOAc was added. The organic layer was washed with water and brine, dried over  $MgSO_4$ , and solvent was evaporated *in vacuo* to afford a white powder (70 %, 0.140 g). The Fmoc-AEPA was used in solid-phase peptide synthesis without further purification. The product contains a minor contaminant (< 10 %) of Fmoc-AEPA-AEPA-OH, as detected by  $^1H$  NMR spectroscopy. HRMS (ESI-TOF)  $m/z$ :  $[M+Na]^+$  calcd for  $C_{25}H_{23}NO_4$  424.1525 found 424.1507.

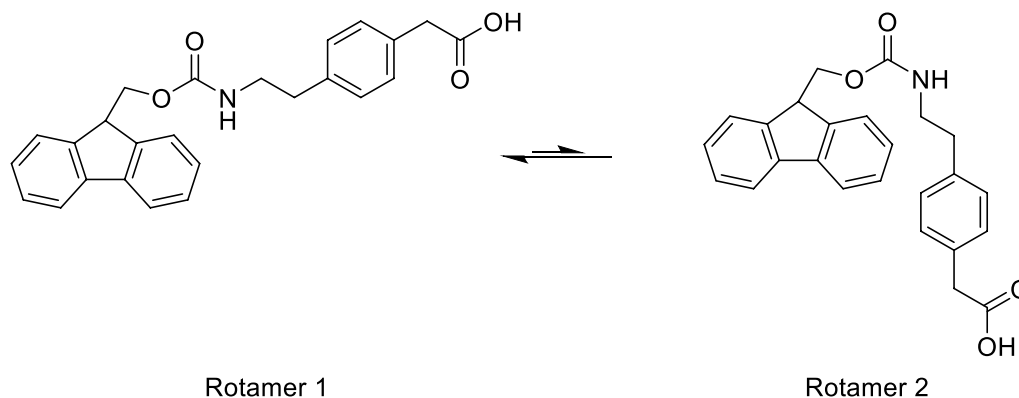

Rotamer 1: Rotamer 2 = ~ 5:1

Rotamer 1:  $^1H$  NMR (600MHz, DMSO-*d*6):  $\delta$  12.17 (s, 1H), 7.89 (d,  $J = 7.6$  Hz, 2H), 7.68 (d,  $J = 7.3$  Hz, 2H), 7.41 (t,  $J = 7.1$  Hz, 2H), 7.38 (t,  $J = 5.3$  Hz, 1H), 7.33 (t,  $J = 7.3$  Hz, 2H), 4.30 (d,  $J = 3.2$  Hz, 2H), 4.20 (t,  $J = 6.6$  Hz, 1H), 3.51 (s, 2H), 3.19 (q,  $J = 6.3$  Hz, 2H), 2.69 (t,  $J = 7.1$  Hz, 2H).  $^{13}C$  NMR (150 MHz, DMSO-*d*6):  $\delta$  173.3, 144.4, 141.3, 138.1, 133.2, 129.8, 129.0, 128.1, 127.5, 125.7, 120.6, 65.7, 47.3, 42.3, 40.8, 40.5, 35.4.

Rotamer 2:  $^1H$  NMR (600MHz, DMSO-*d*6):  $\delta$  12.17 (s, 1H), 7.89 (d,  $J = 7.6$  Hz, 2H), 7.68 (d,  $J = 7.3$  Hz, 2H), 7.41 (t,  $J = 7.1$  Hz, 2H), 7.33 (t,  $J = 7.3$  Hz, 2H), 6.84 (t,  $J = 5.6$  Hz, 1H), 4.30 (d,  $J = 3.2$  Hz, 2H), 4.20 (t,  $J = 6.6$  Hz, 1H), 3.51 (s, 2H), 2.92 (q,  $J = 6.3$  ppm, 2H), 2.36 (t,  $J = 7.1$  Hz, 2H).

$^1H$  NMR assignment:

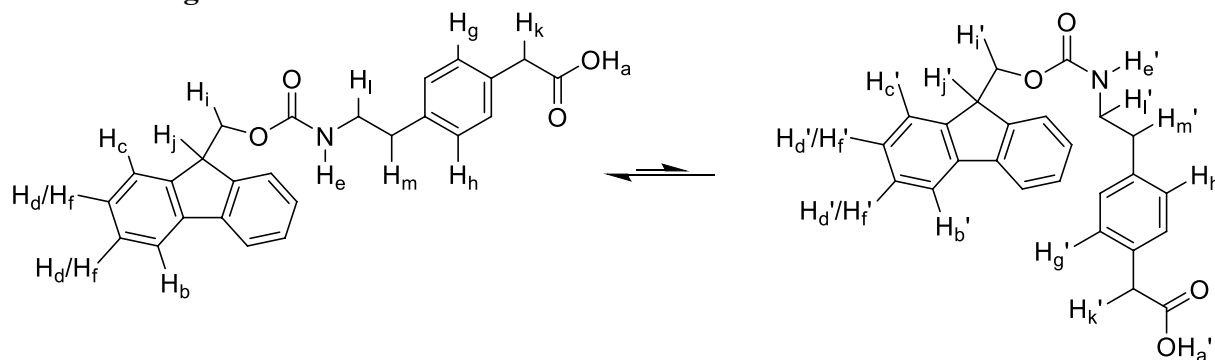

**COSY correlations:**

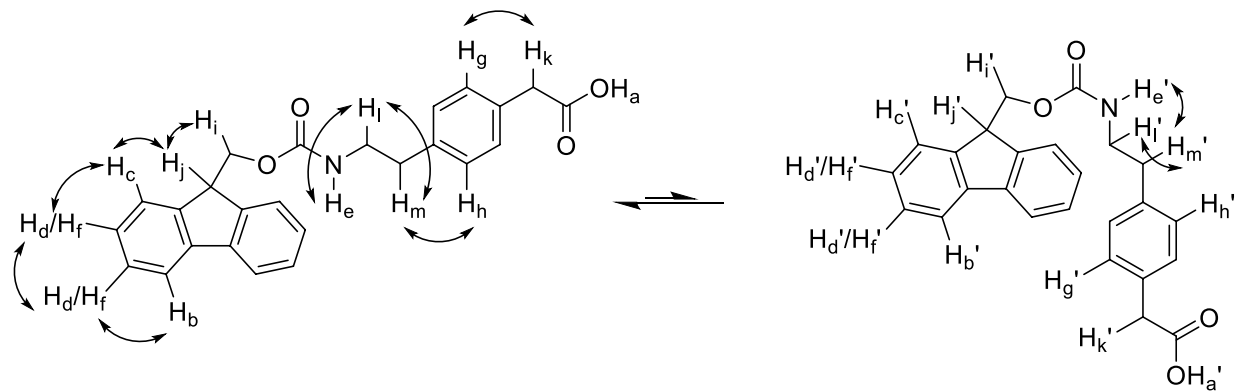

**Rotamer indicative EXSY correlations:**

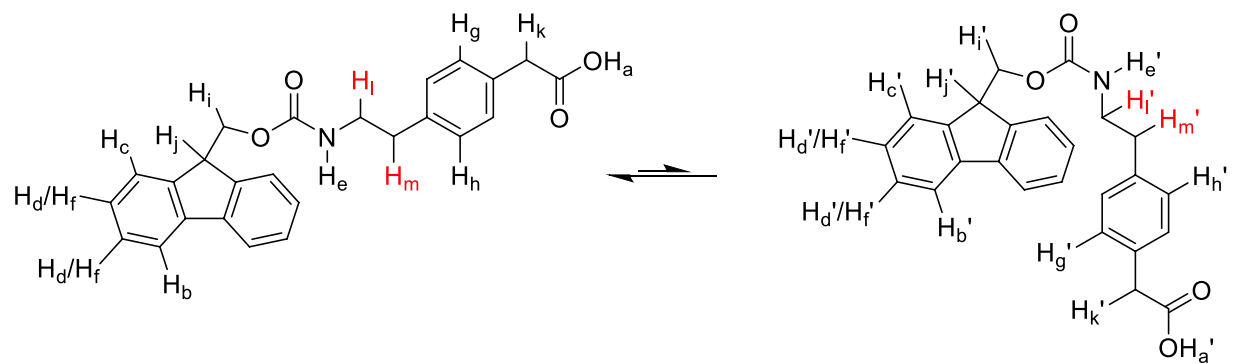

MS-11-110 1 1 "C:\Users\msjkr\OneDrive - personal\crosssoft\software\sci\_edu\ump\ump\_data"  
1H spectrum

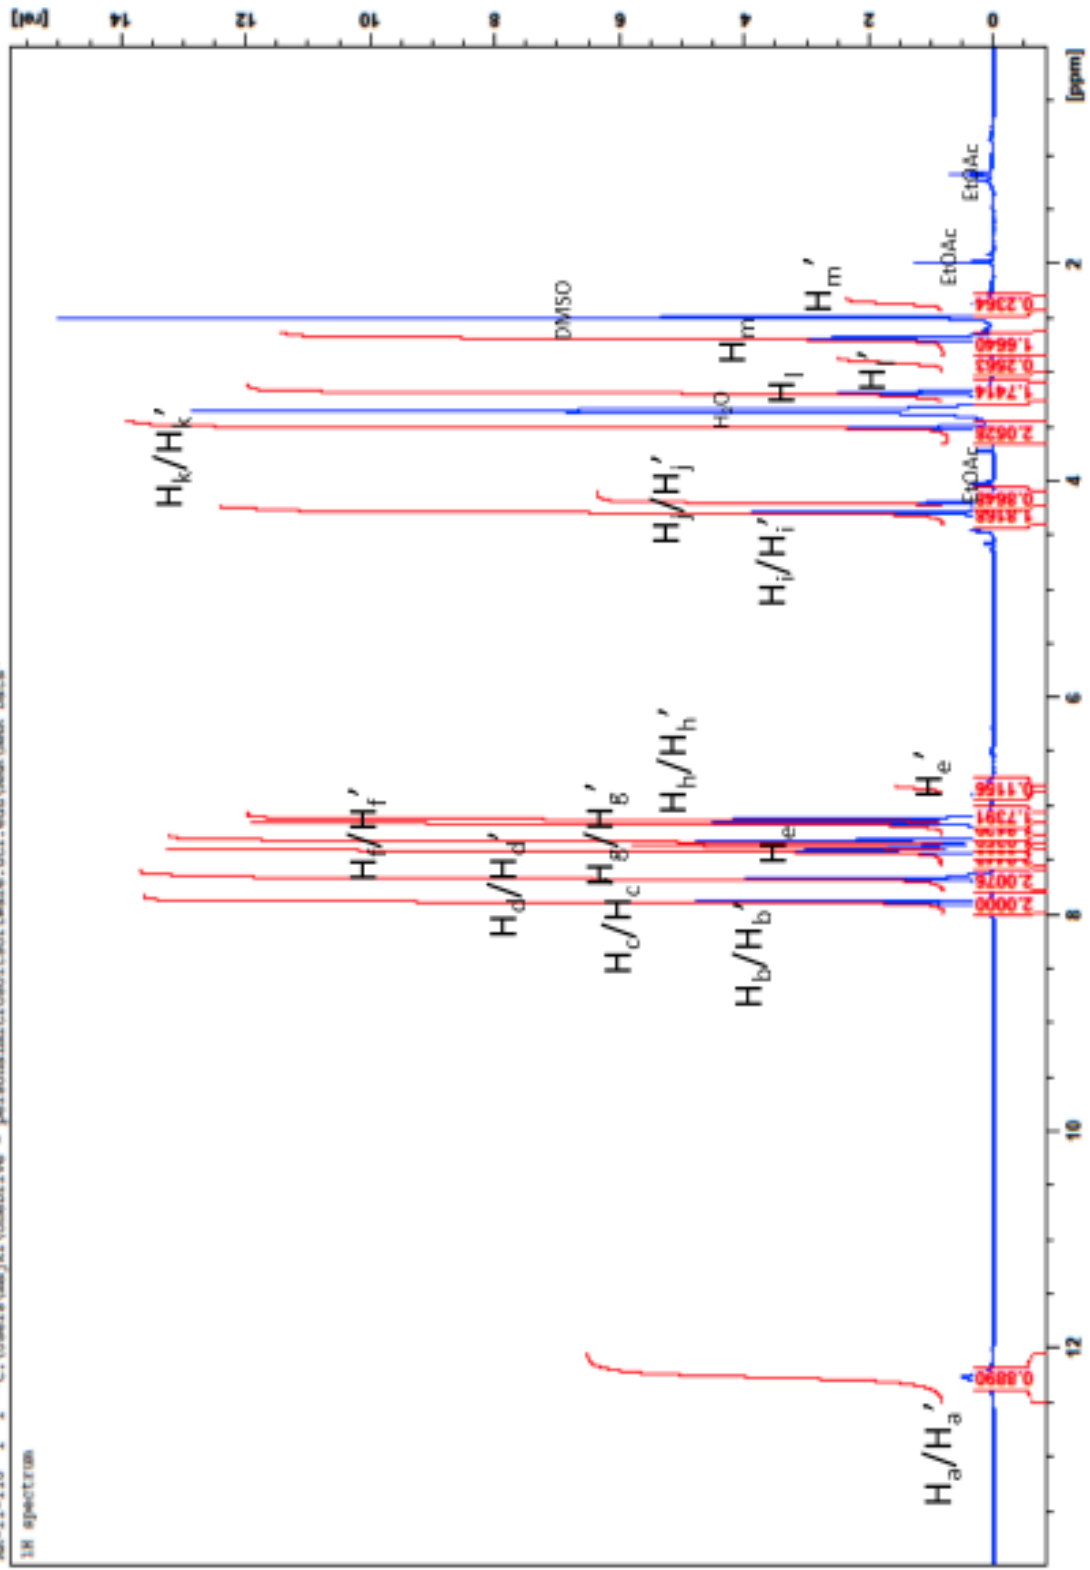

MS-II-110 1 1 "C:\Users\majkr\OneDrive - personal\microsoftsoftware\pcl.edu\566\566\_data"

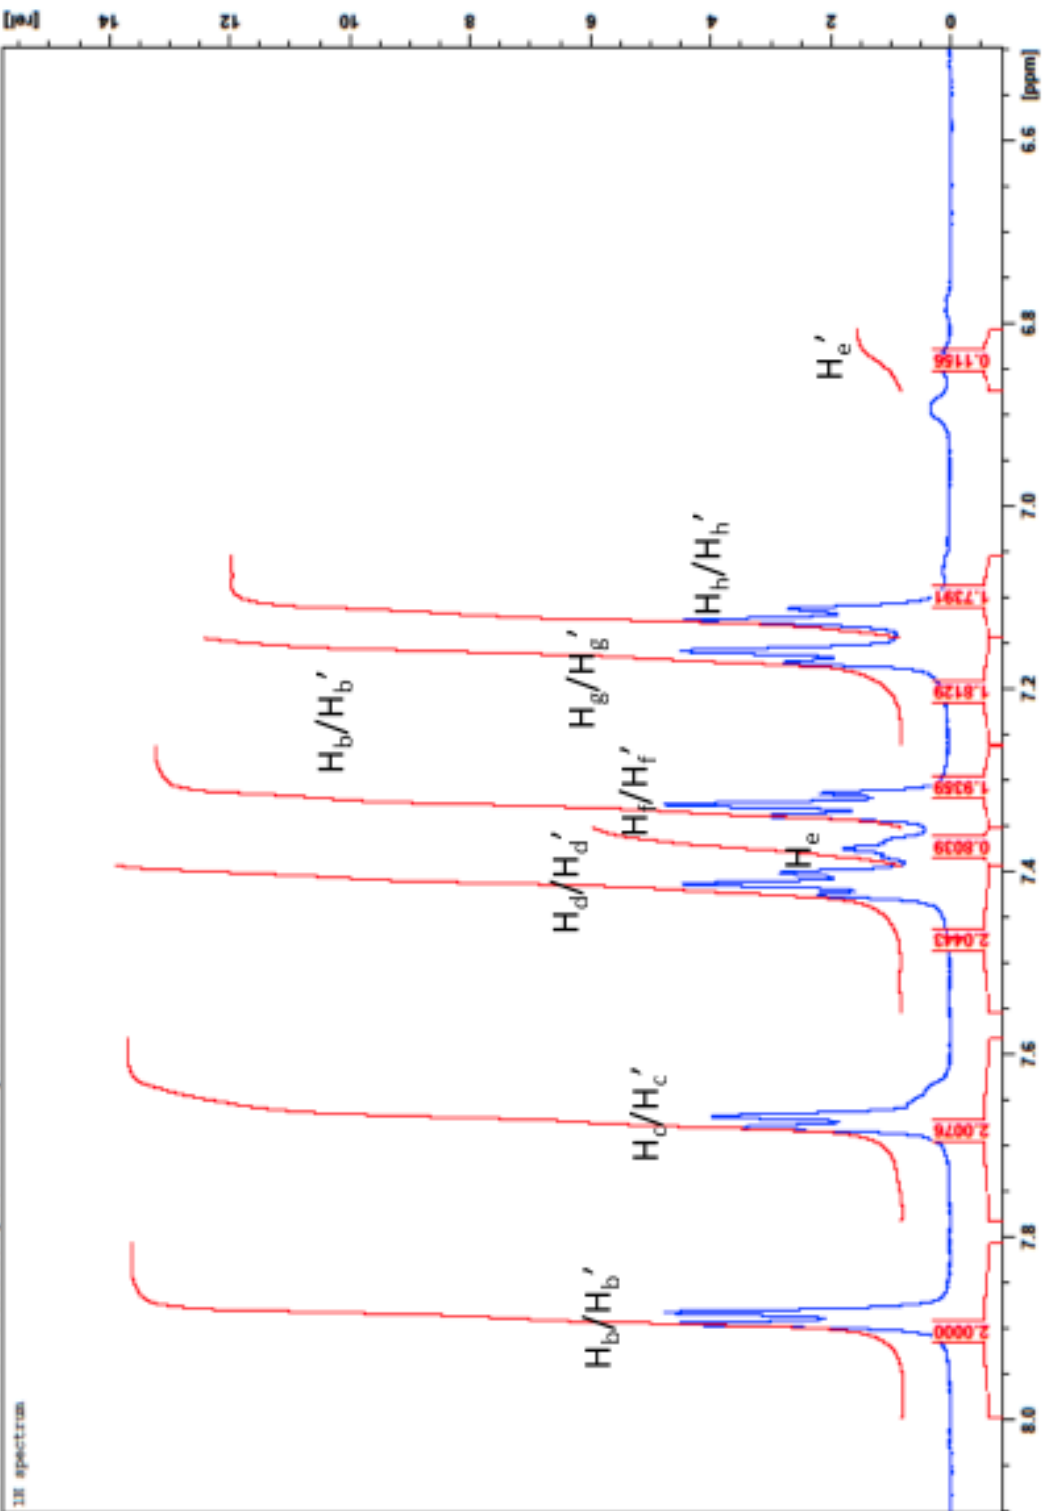

1H spectrum

MS-II-110 1. 1. "C:\Users\awjkr\OneDrive - personal\microsoftware\oci.edu\MSD\MSD Data"

1H spectrum

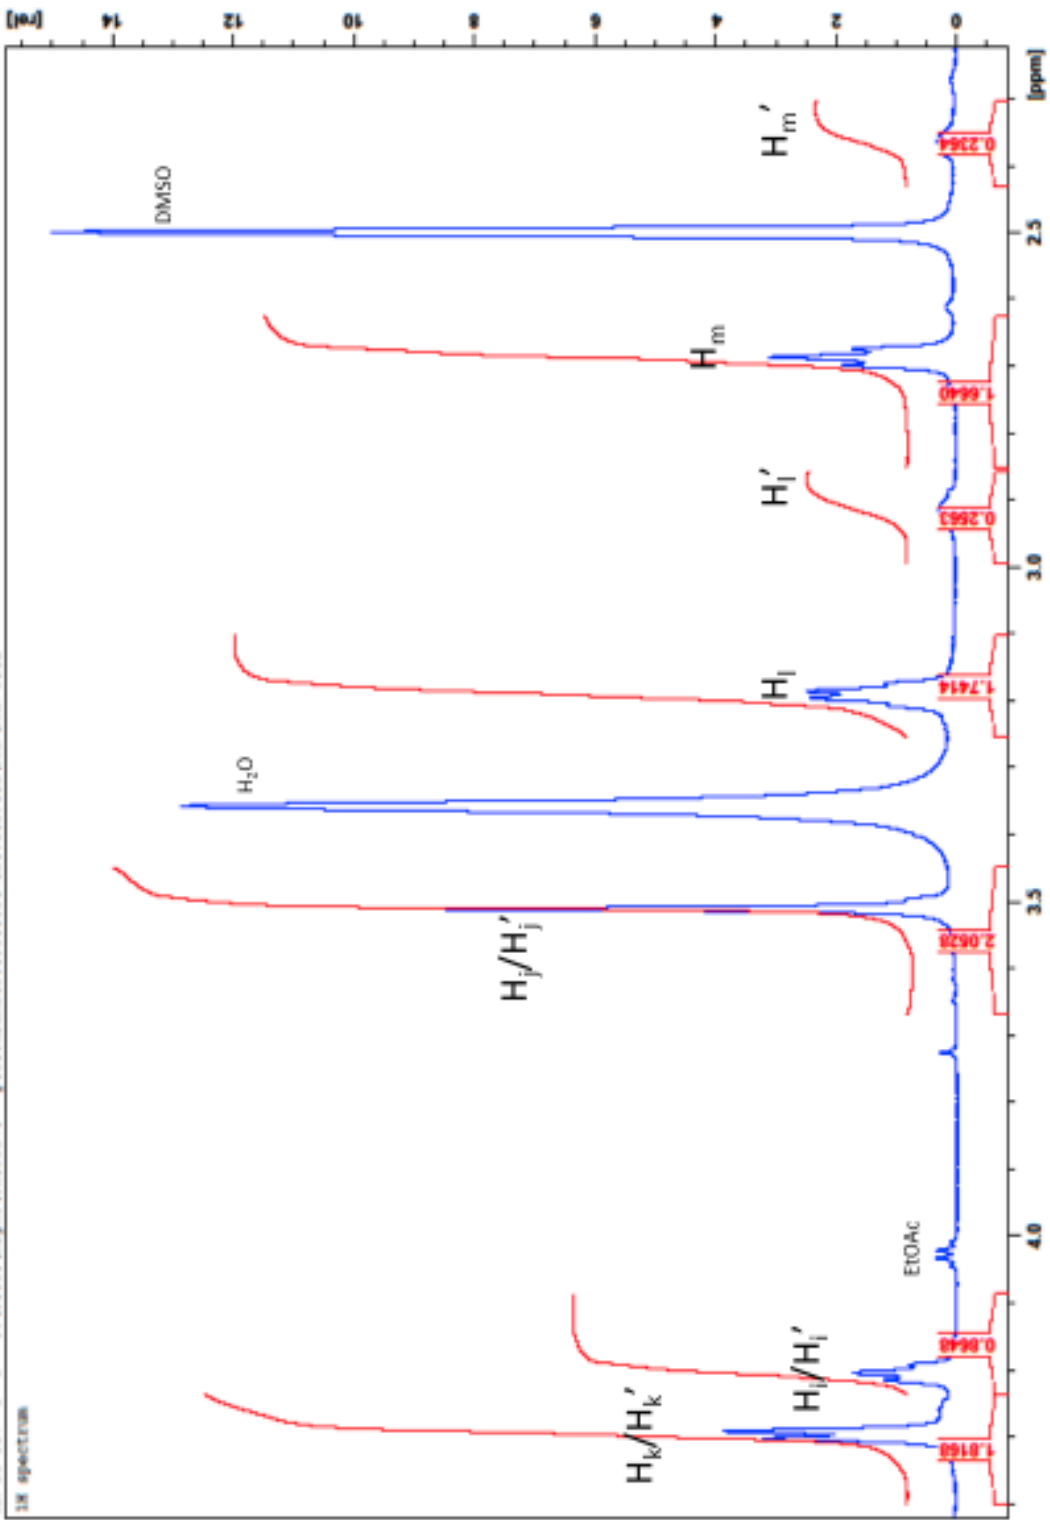

MS-II-110 2 1 "C:\Users\saajkr\OneDrive - personal\microsoftware.uci.edu\MSD\MSD Data"  
13C spectrum with 1H decoupling

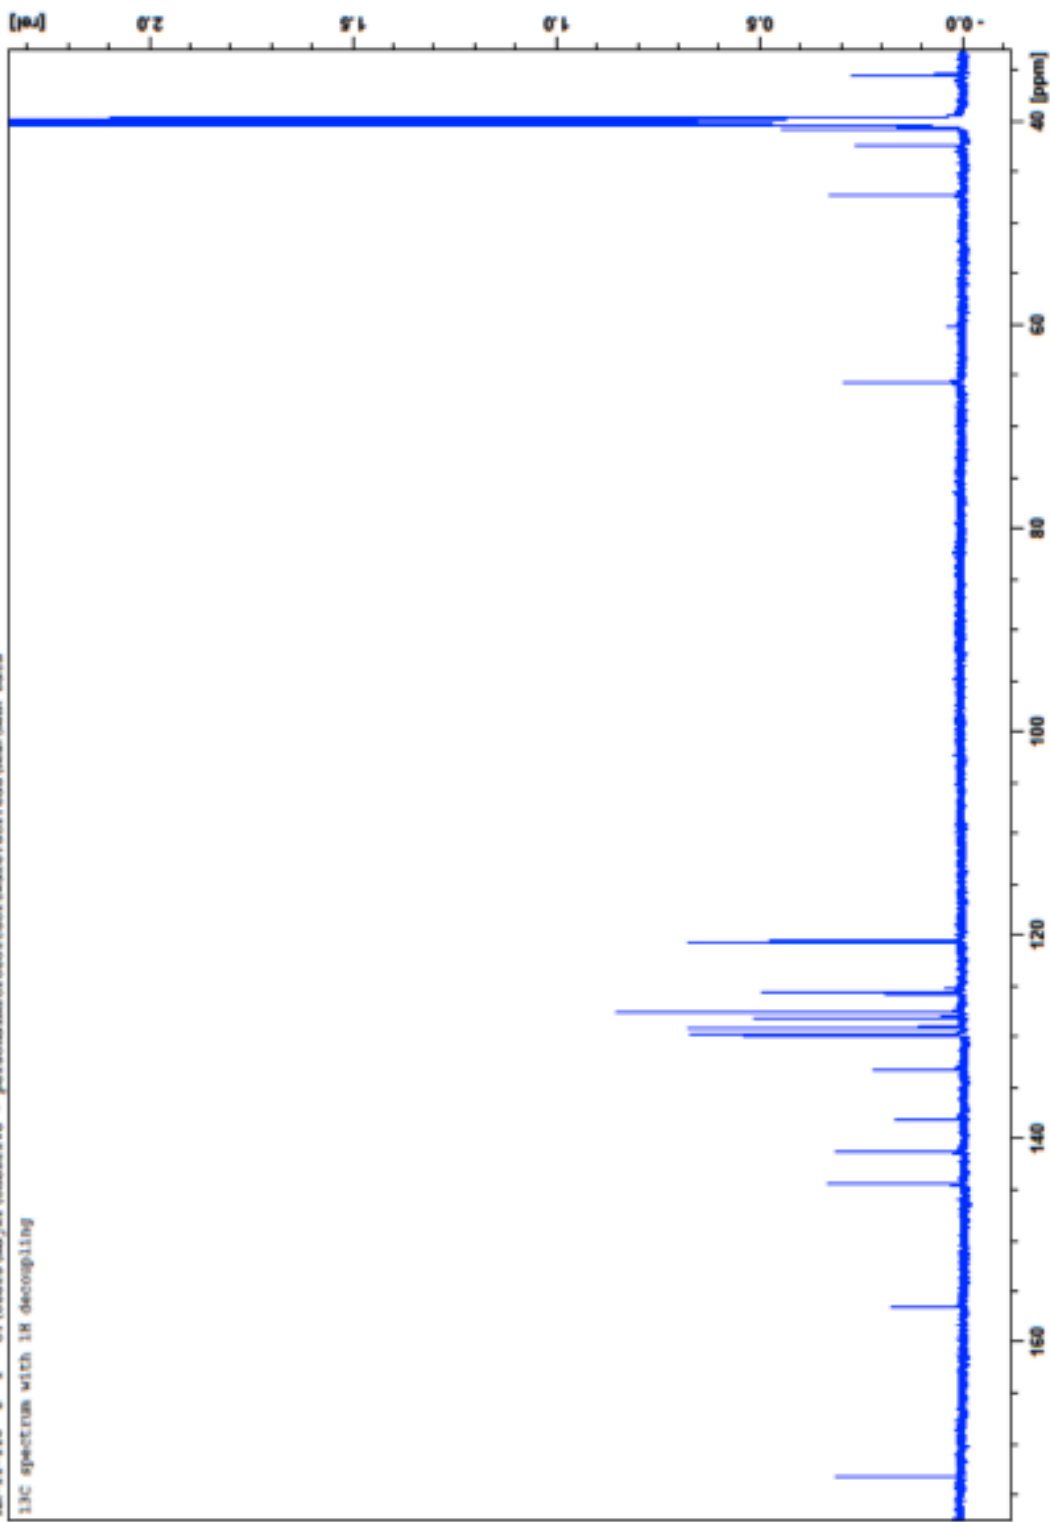



MS-11-110 4 1 "C:\Users\user\OneDrive - personalmicrosoftware\uci.edu\MSD\MSD Data"

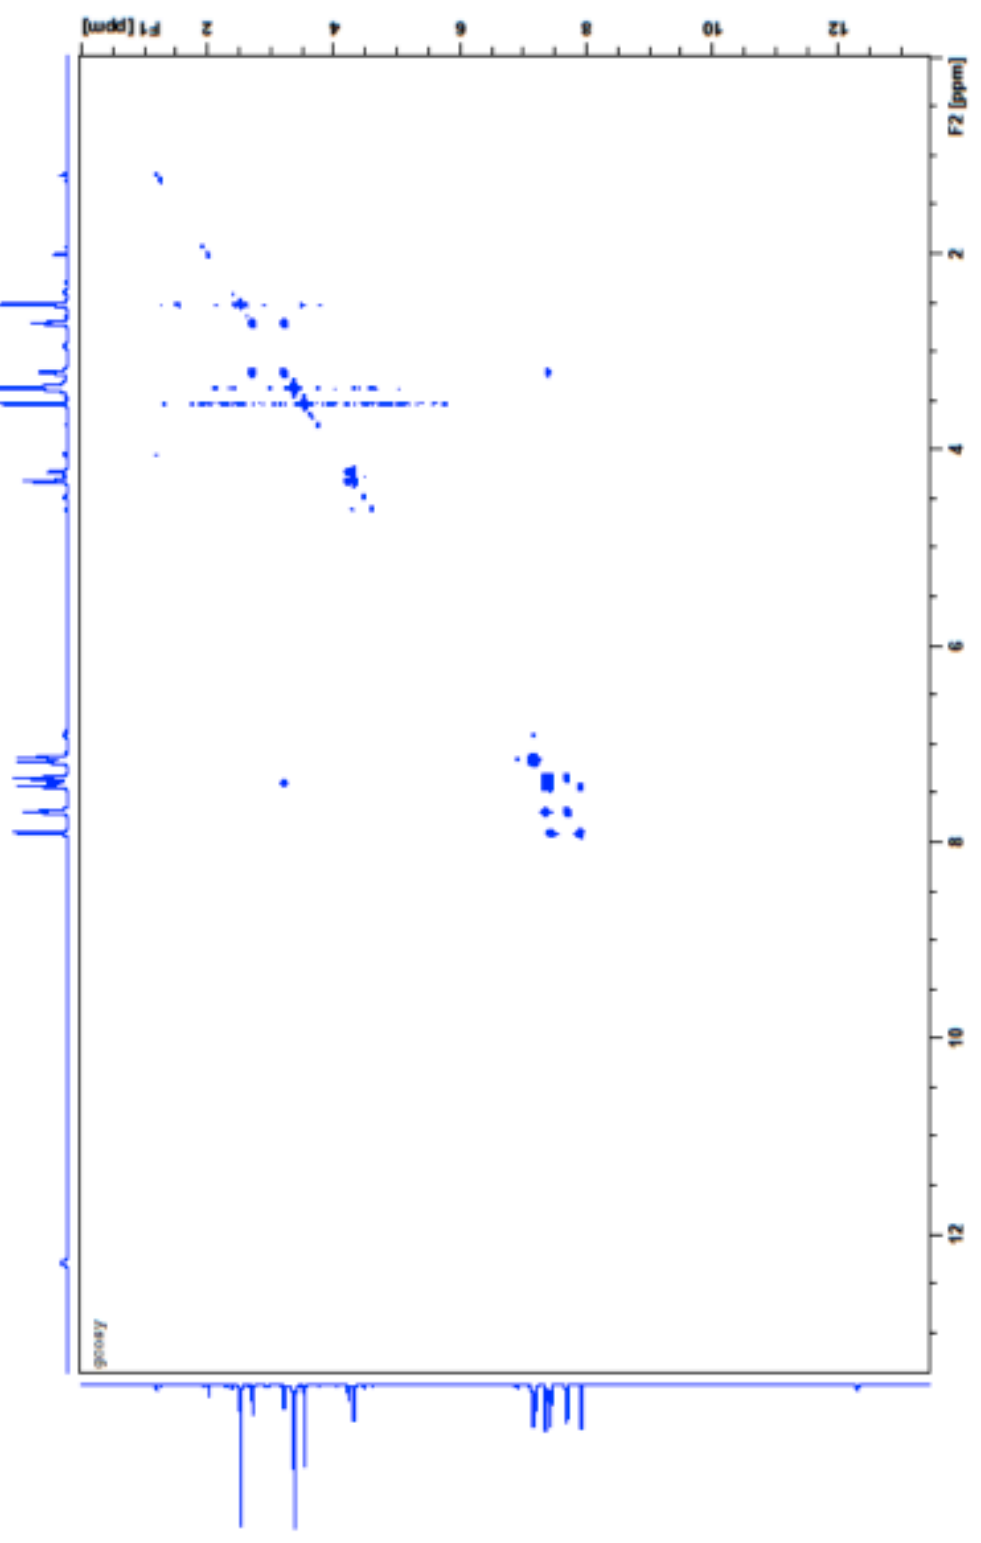

MS-II-110 6 1 "C:\Users\mujar\OneDrive - personalmicrosoftware.uct.edu\MSII\MSII Data"

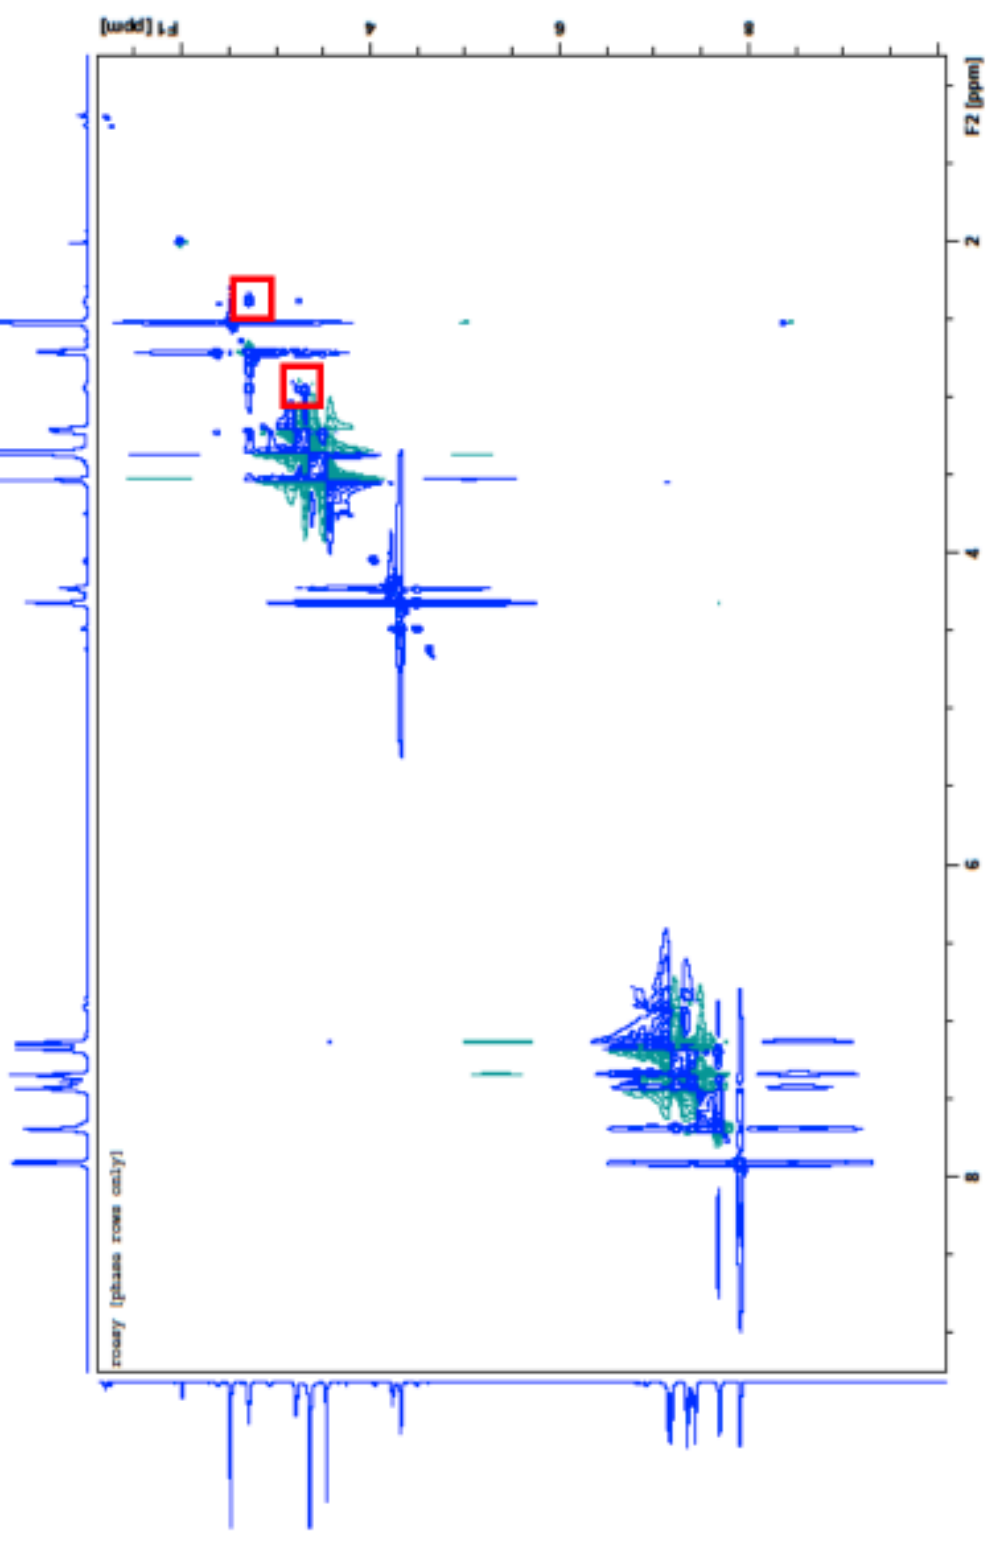

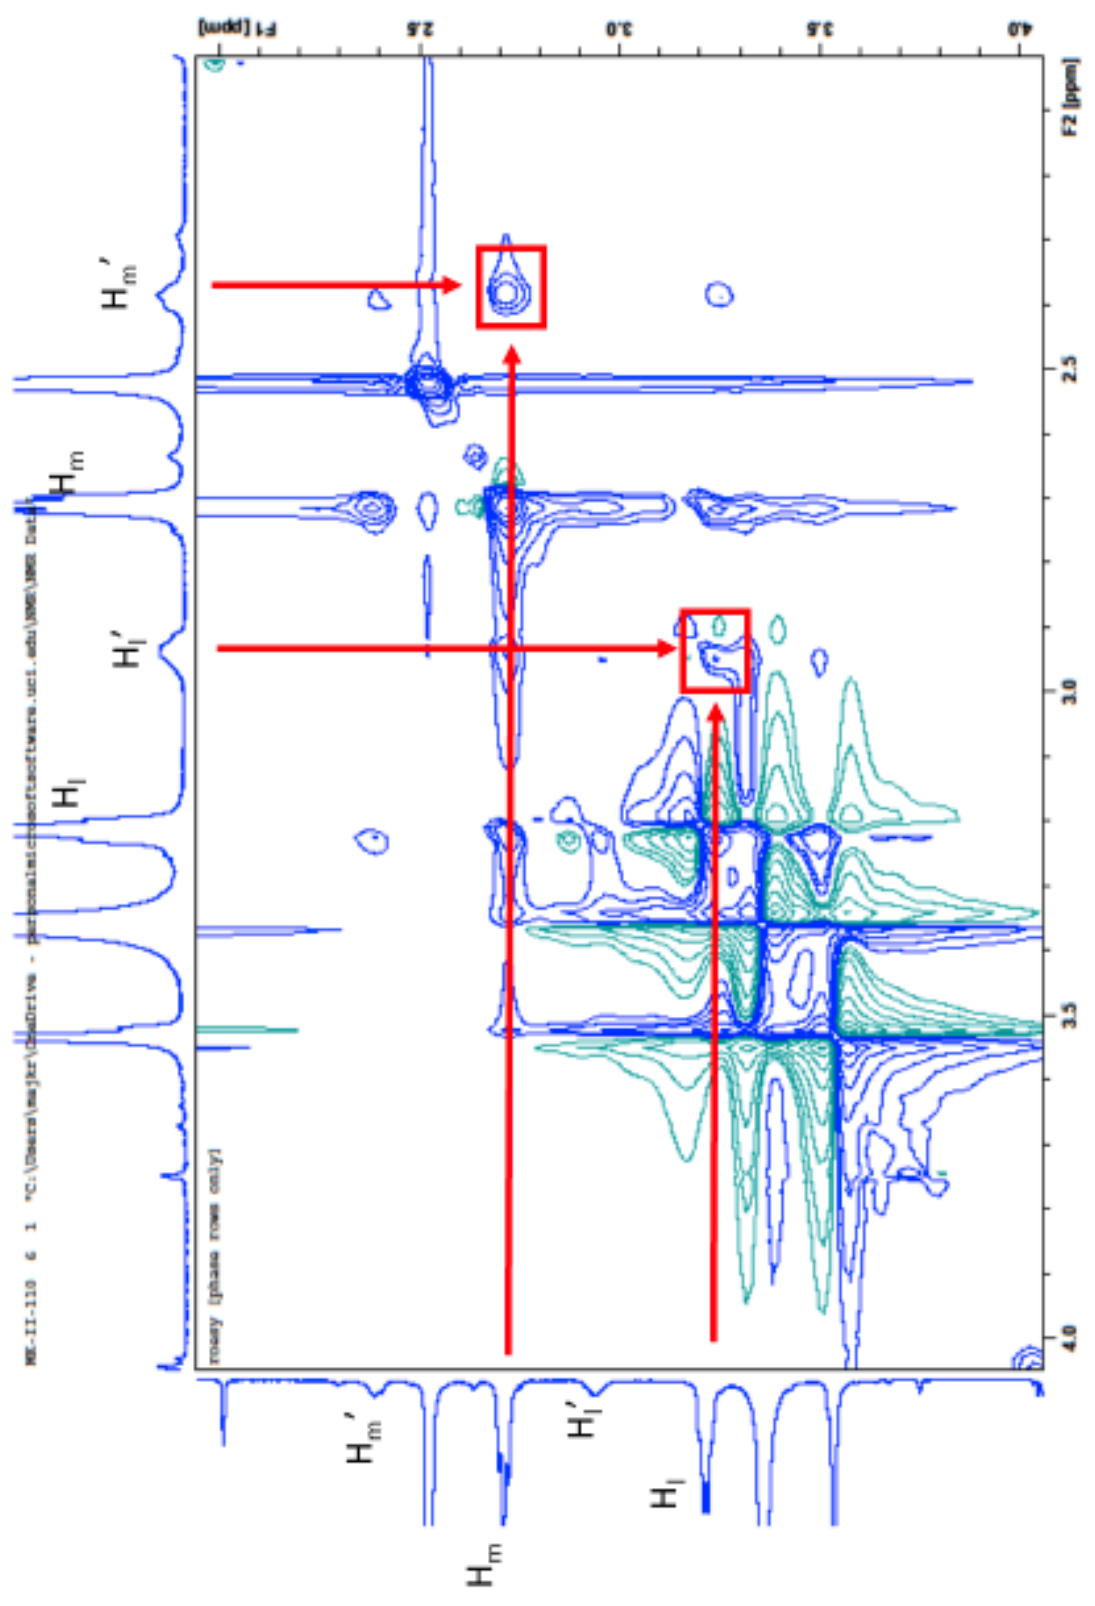

## Peptide Characterization Data

### *Characterization of UCI-1*

Analytical HPLC trace of UCI-1.

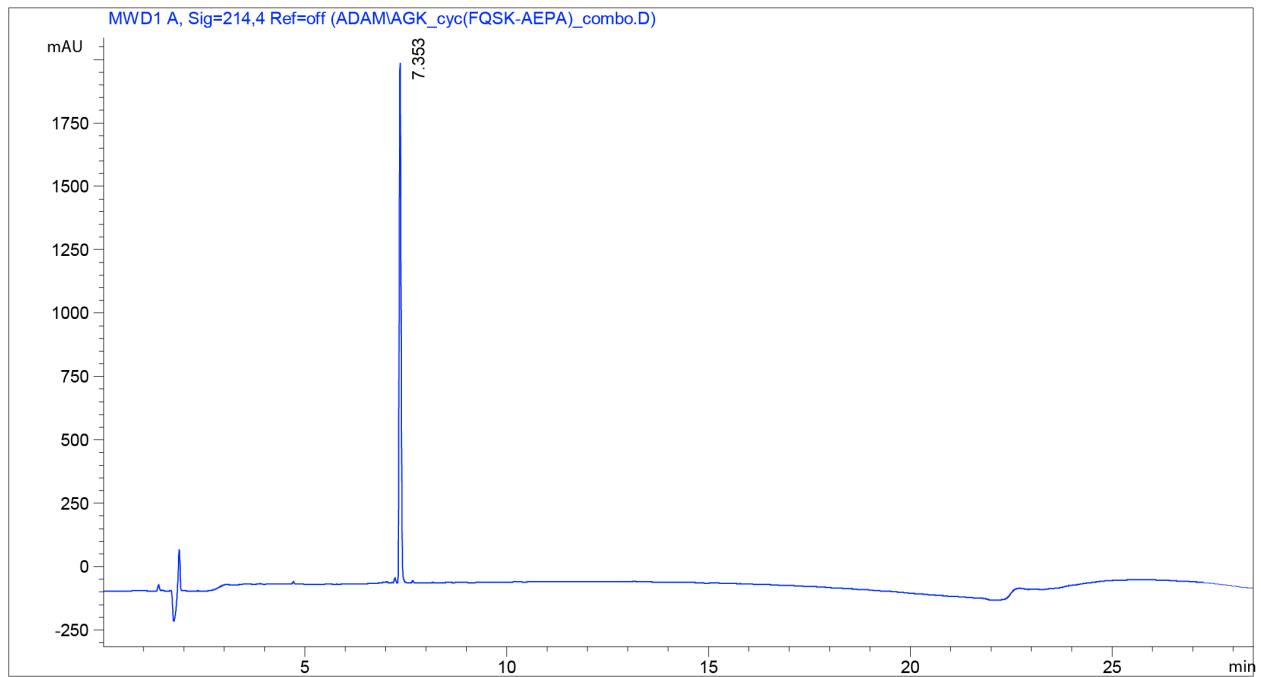

Mass spectrum of UCI-1.

**Applied Biosystems MDS Analytical Technologies TOF/TOF™ Series Explorer™ 72039**

**TOF/TOF™ Reflector Spec #1[BP = 674.3, 9693]**

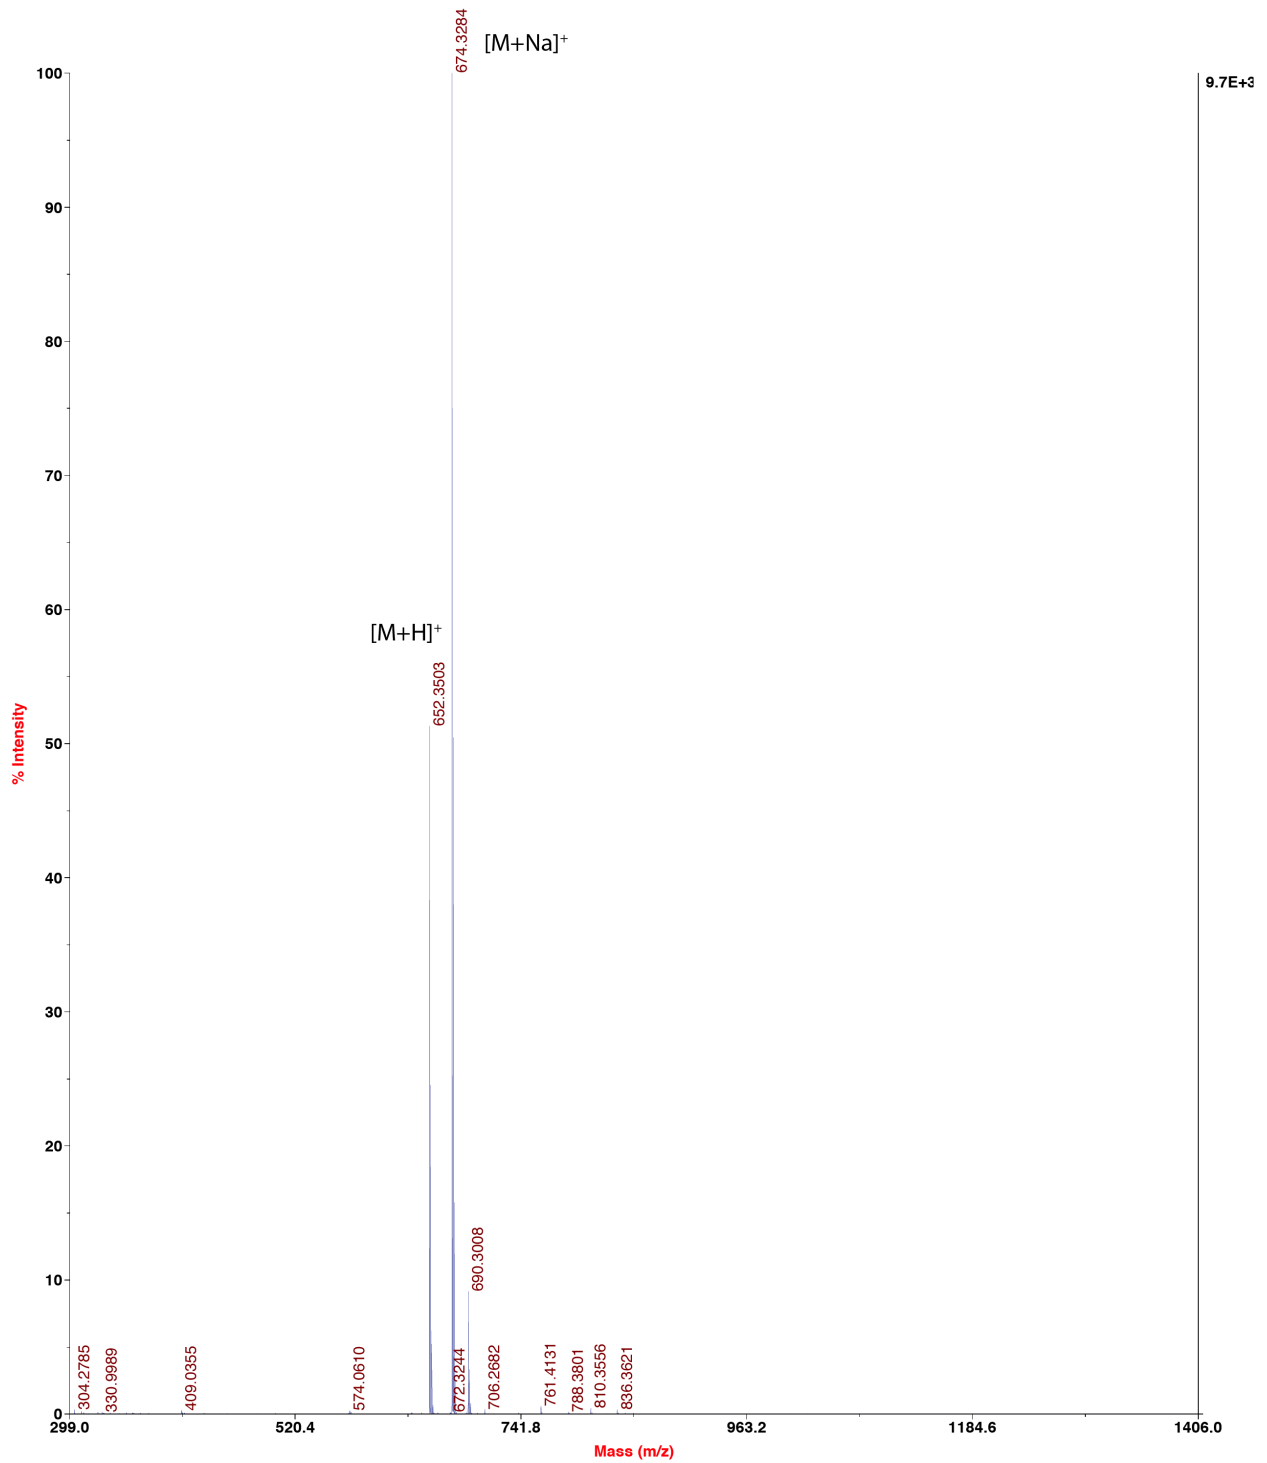

V:\old\_c\Data\Nowick\Adam\COVID-19\FQSK-AEPA\_combo.T2D

Printed: 13:42, May 20, 2020

*Characterization of peptide-1a*

Analytical HPLC trace of peptide-1a.

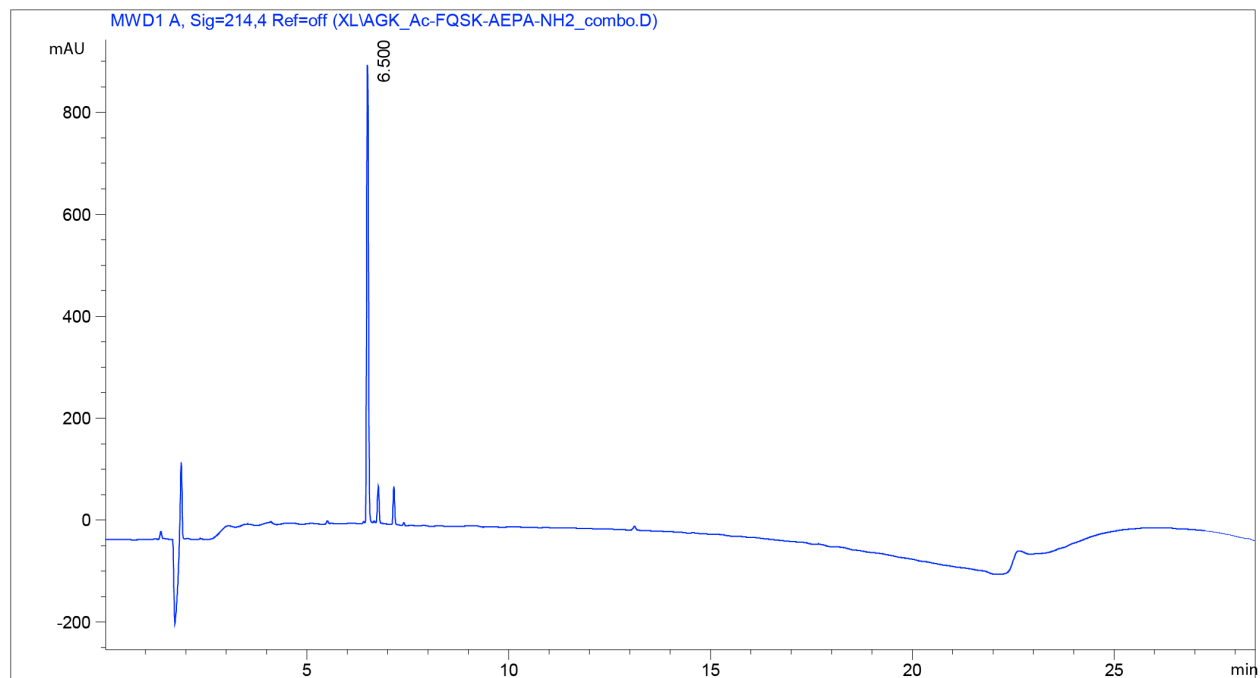

Mass spectrum of peptide-1a.

**Applied Biosystems MDS Analytical Technologies TOF/TOF™ Series Explorer™ 72039**

**TOF/TOF™ Reflector Spec #1[BP = 733.4, 1454]**

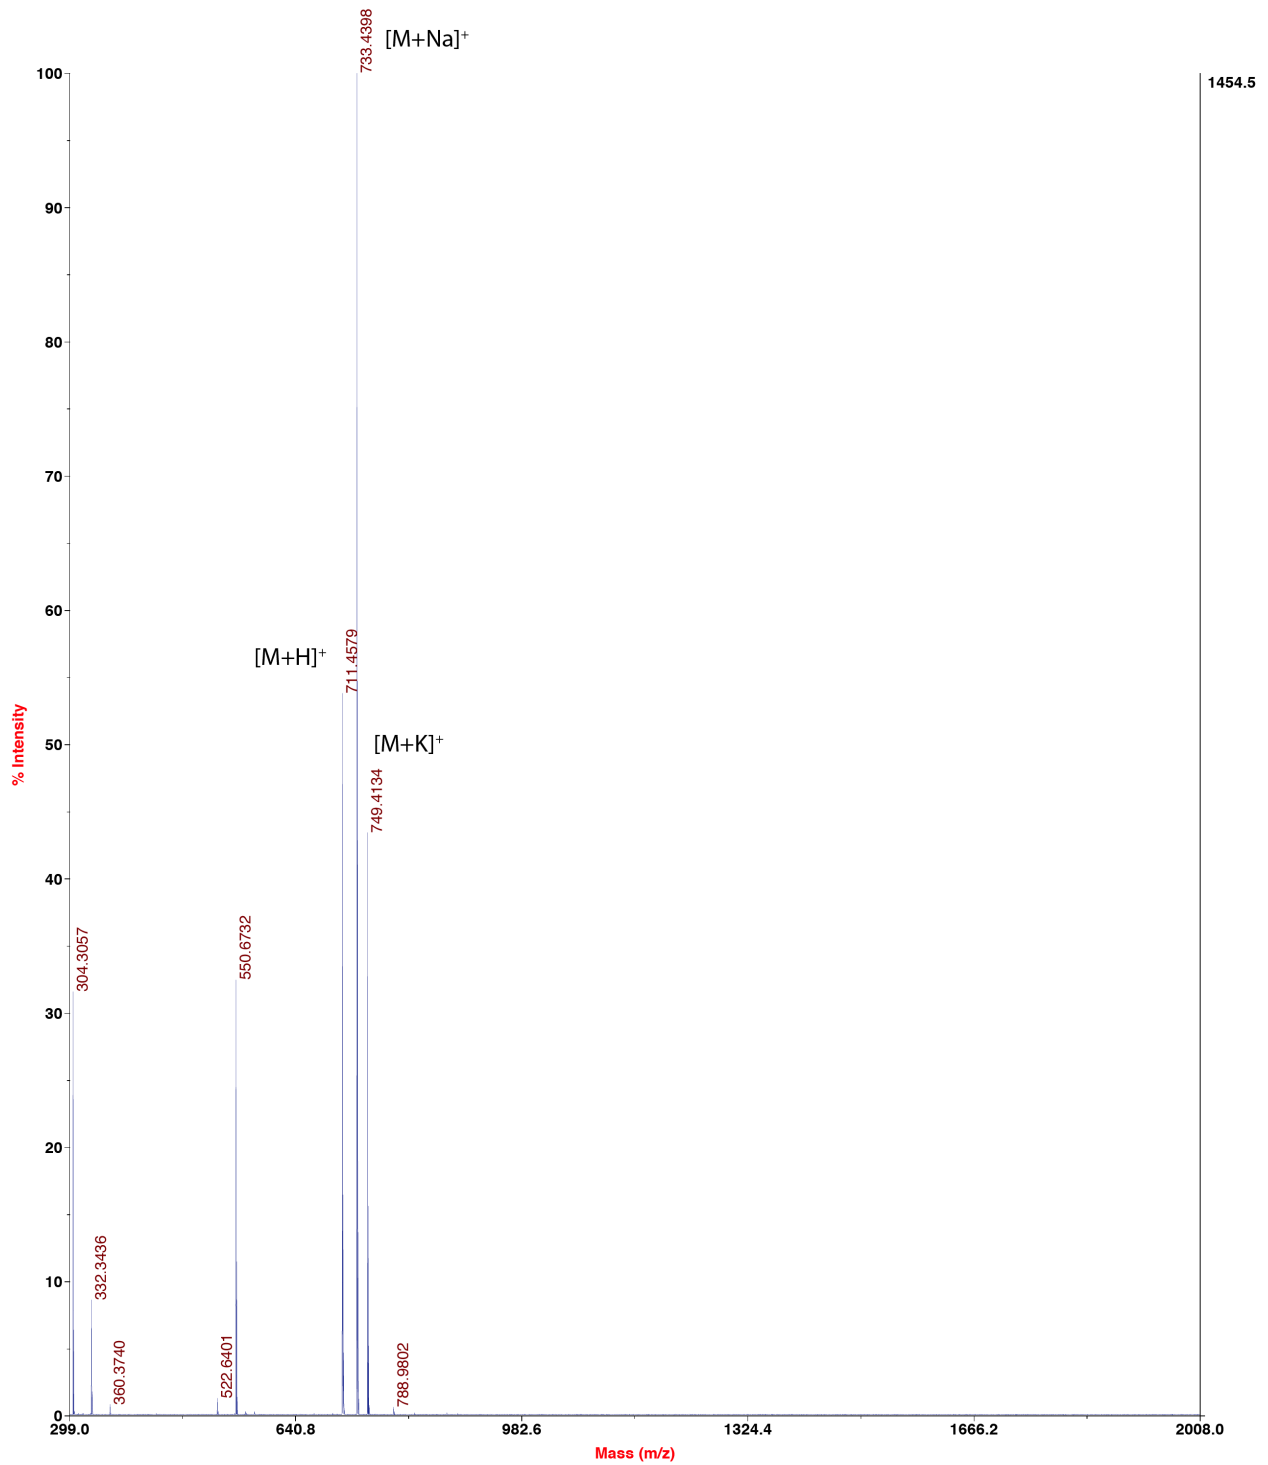

V:\old\_cData\Nowick\Adam\COVID-19\Ac-FQSK-AEPA-NH2\_combo.T2D

Printed: 11:17, July 16, 2020

Characterization of peptide-1b

Analytical HPLC trace of peptide-1b.

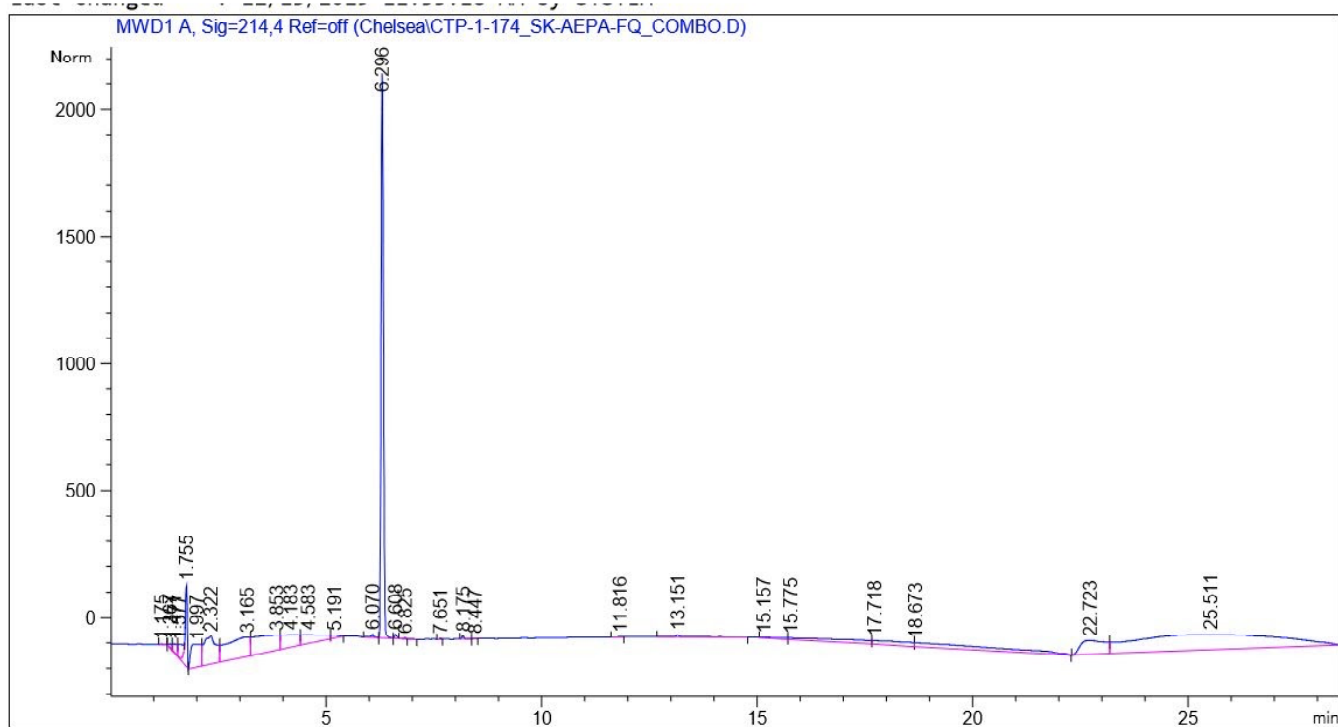



Mass spectrum of peptide-1b.

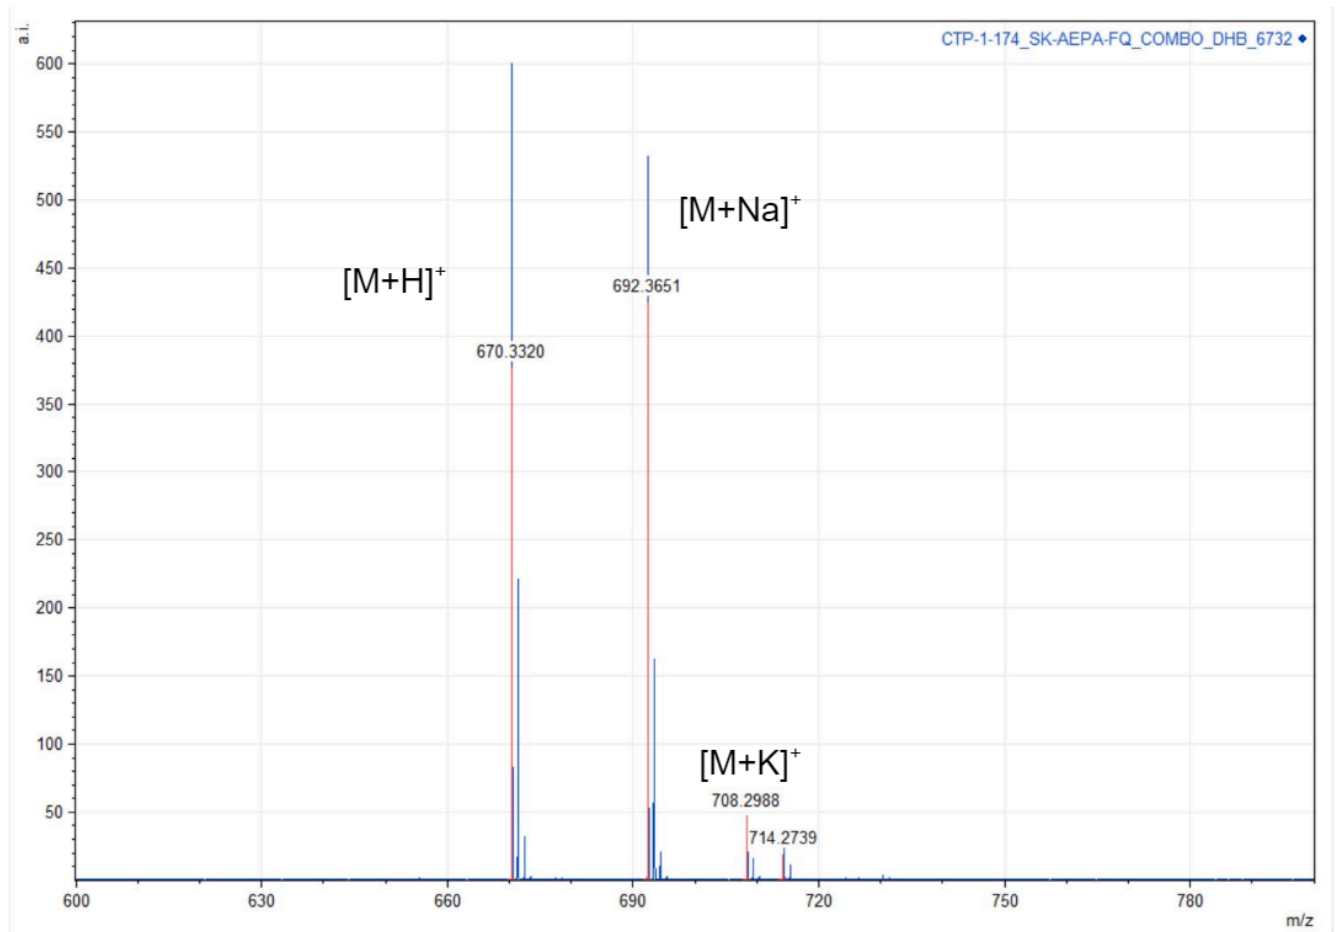

Supplement: Supplementary file [file media-1.pdf]
